# Supplementary material for: Photodynamic Effects with 5-Aminolevulinic Acid on Cytokines and Exosomes in Human Peripheral Blood Mononuclear Cells from Patients with Crohn’s Disease
Source: MDPI journal article supplement (doi:10.3390/ijms24054554), 2023-02-25
Supplement: s1 [file s1]

Crohn's Patient #7

Gating Strategy: (Step 1) Lymphocytes

Control

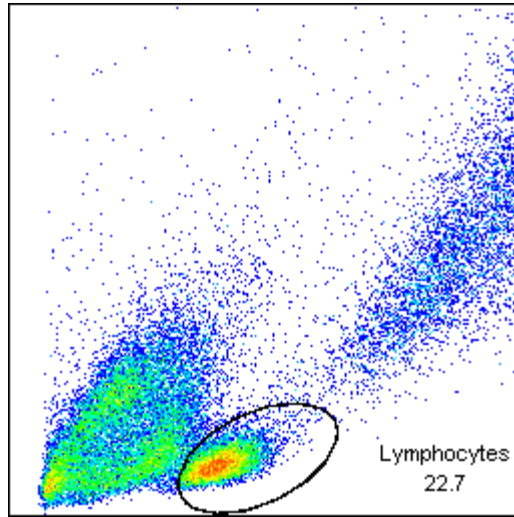

LED630nm 30 min.

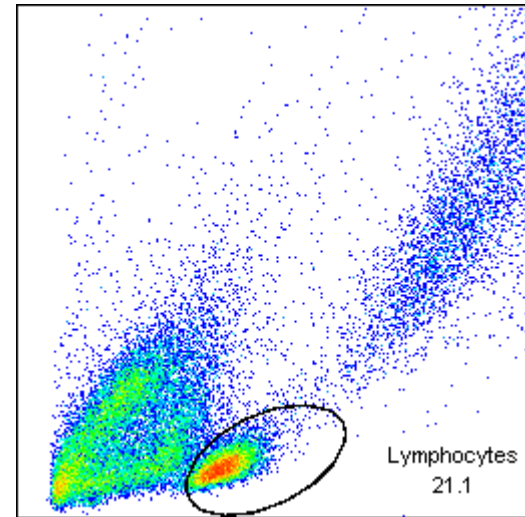

LED630nm 30 min.

3 mM ALA  
4 hr

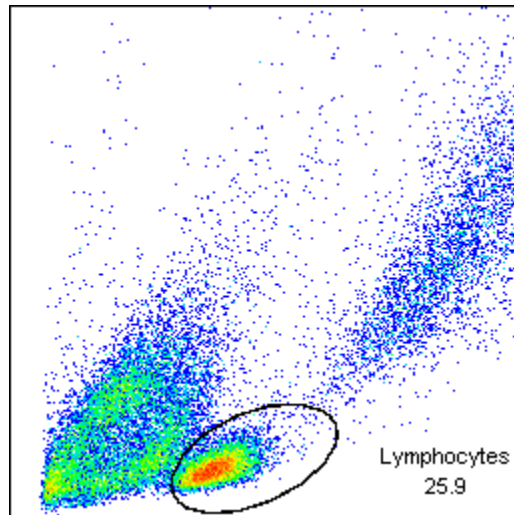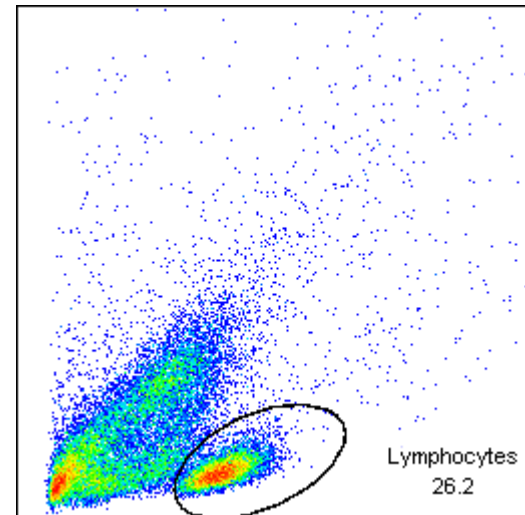

SSC

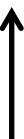

FSC

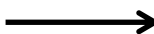

Crohn's Patient #7

## Gating Strategy: (Step 2) Single lymphocytes

Control

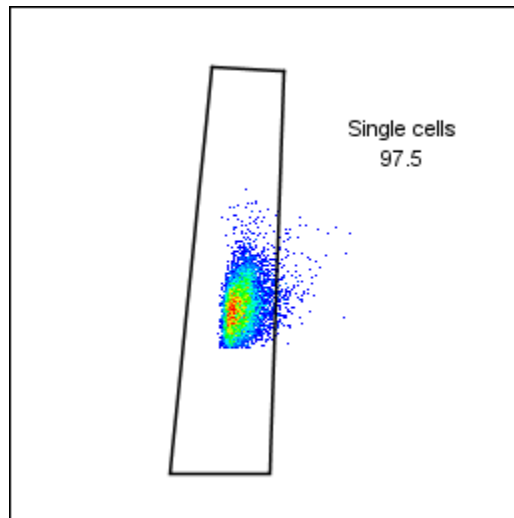

LED630nm 30 min.

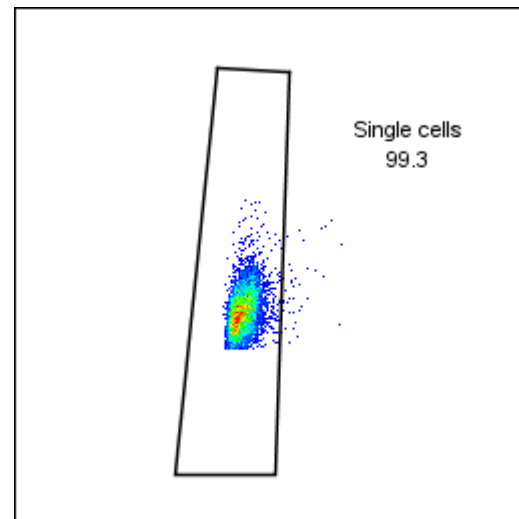

LED630nm 30 min.

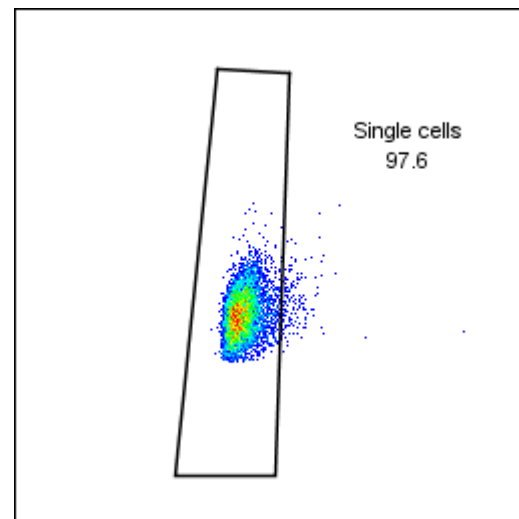

3 mM ALA  
4 hr

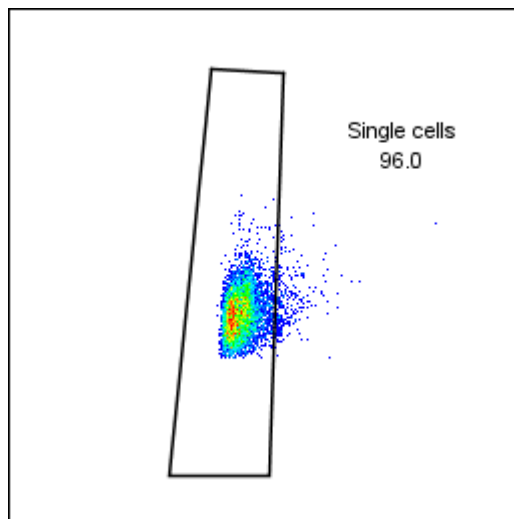

FSC

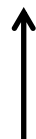

FSC-Width

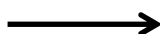

Crohn's Patient #7

## Gating Strategy: (Step 3) B-cells

Control

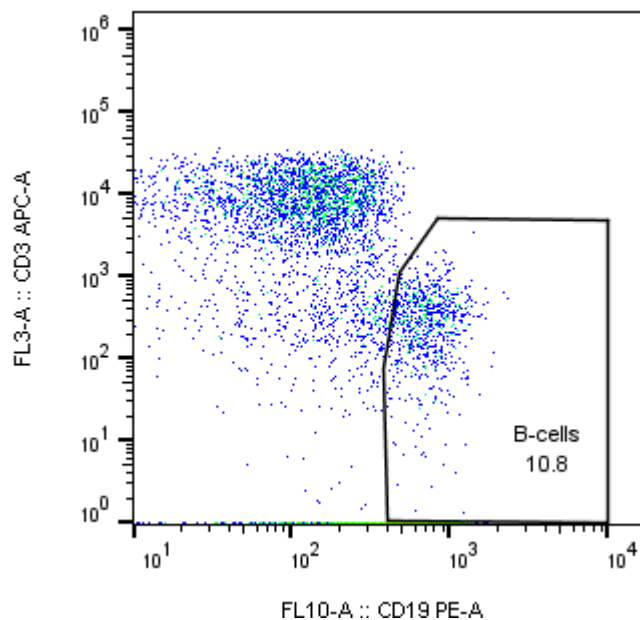

LED630nm 30 min.

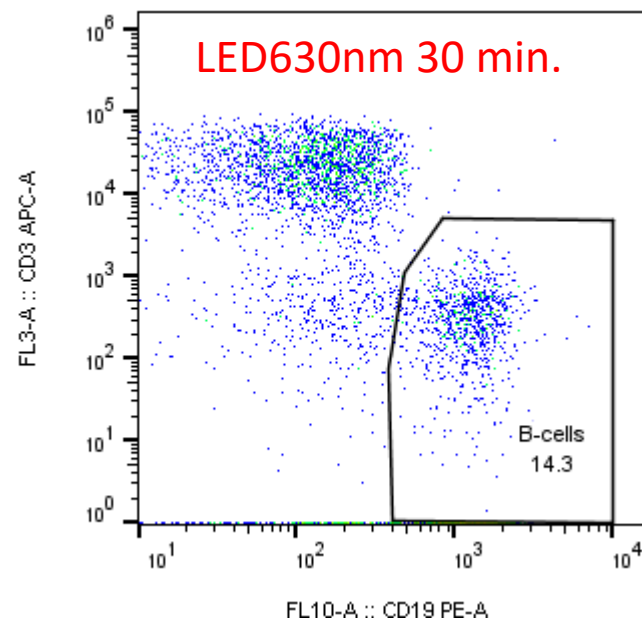

3 mM ALA  
4 hr

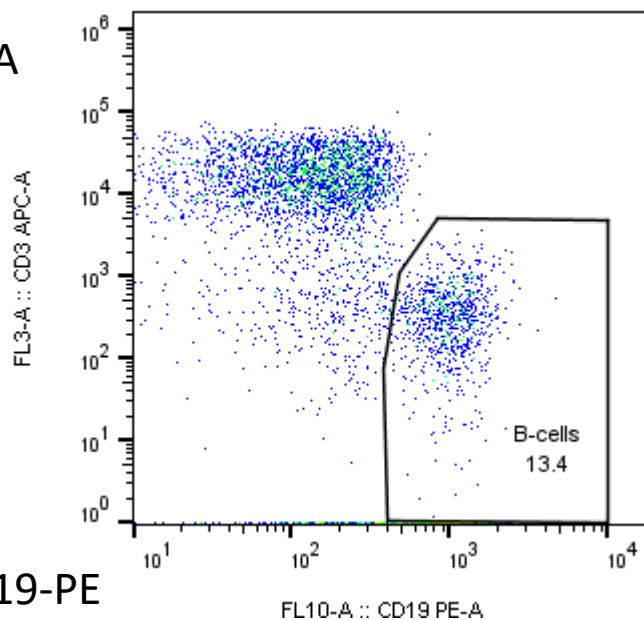

LED630nm 30 min.

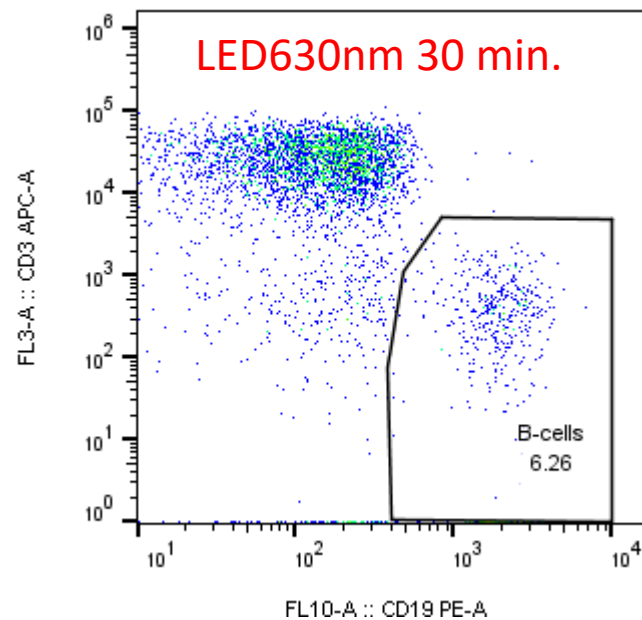

CD3-APC

CD19-PE

Crohn's Patient #7

Gating Strategy: (Step 4) Live B-cells

LED630nm 30 min.

Control

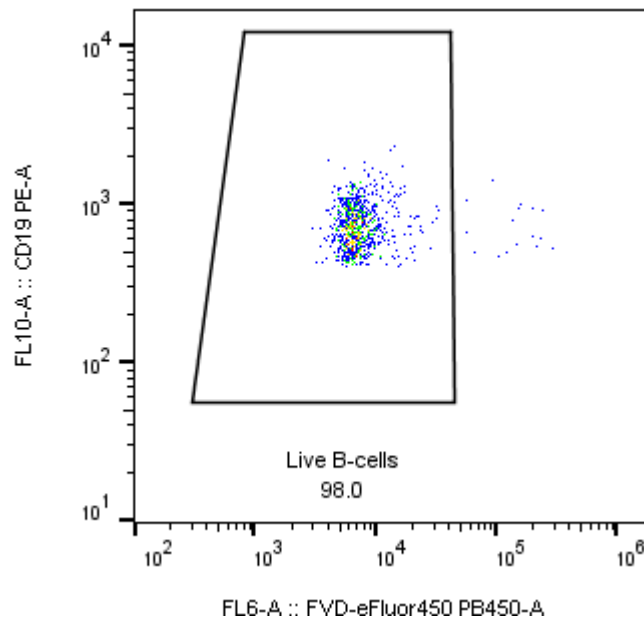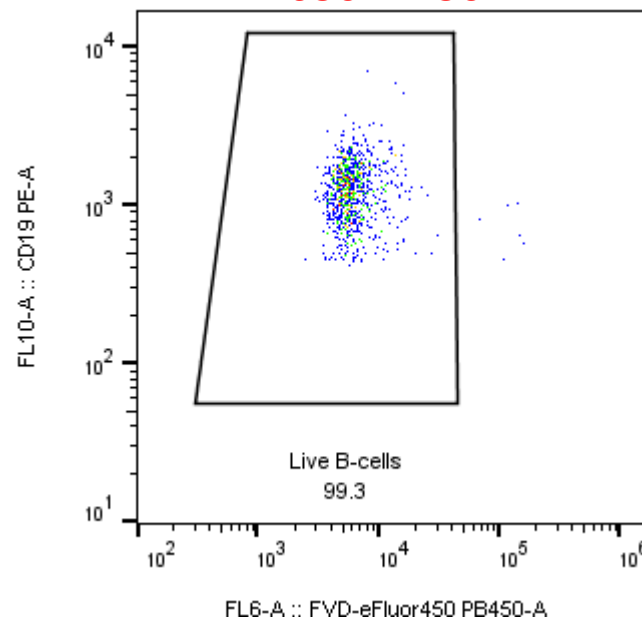

3 mM ALA  
4 hr

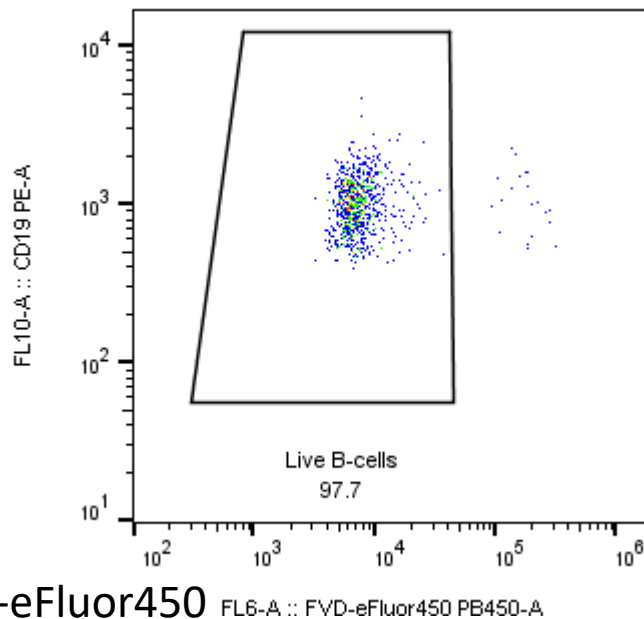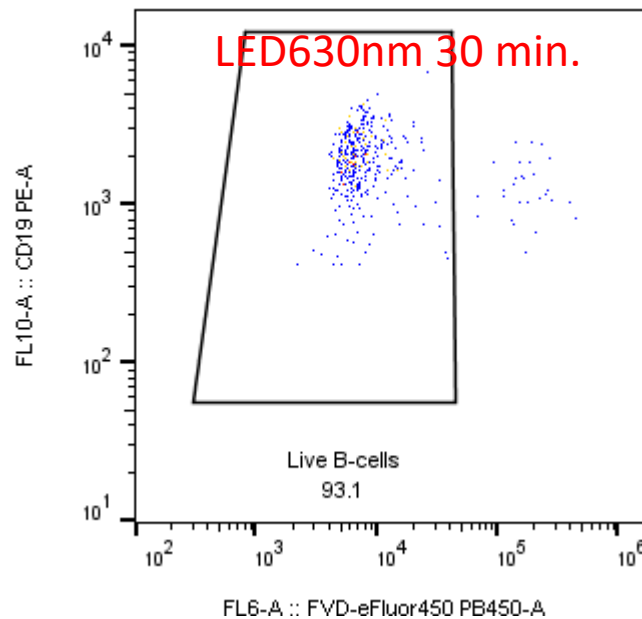

CD19-PE

FVD-eFluor450
